# Supplementary material for: Pathology of A(H5N8) (Clade 2.3.4.4) Virus in Experimentally Infected Chickens and Mice
Source: Hindawi journal article supplement (doi:10.1155/2019/4124865), 2019-07-04

Brain

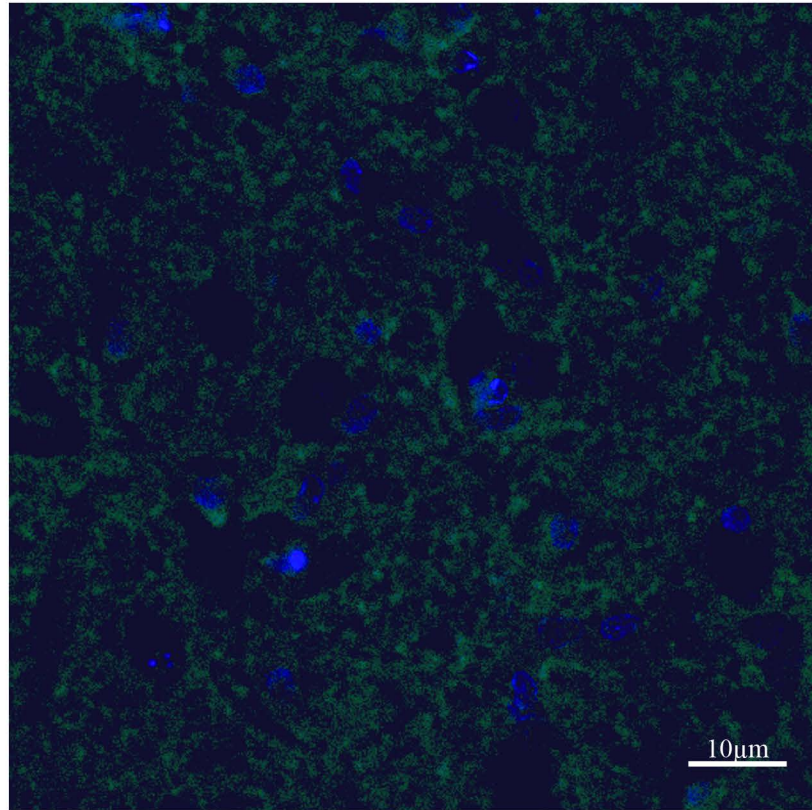

Lung

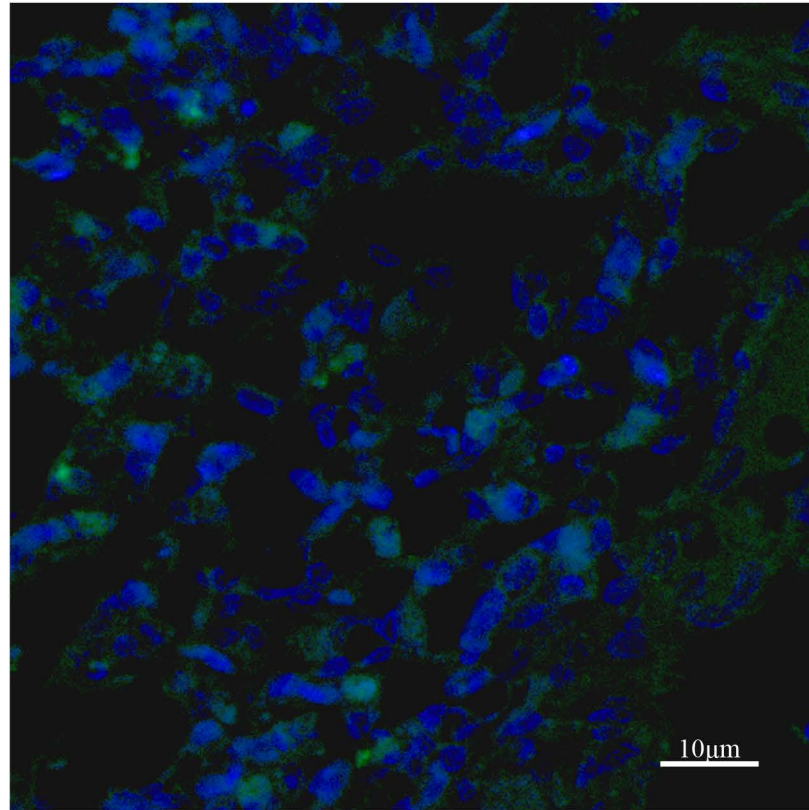

Heart

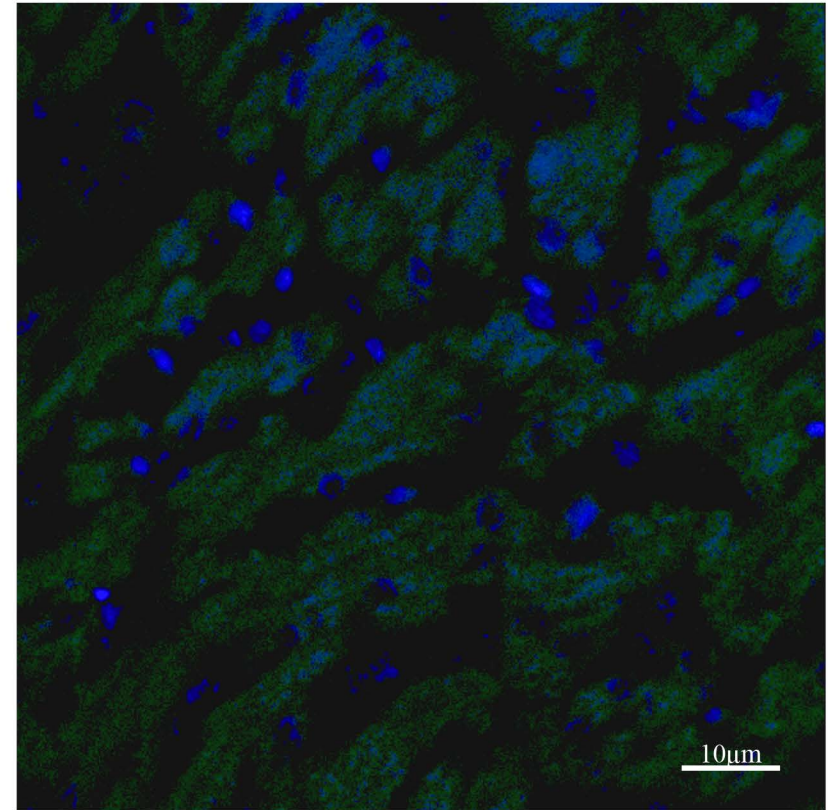

Supplement: f1 [file 4124865.f1.pdf]
